# Supplementary material
Source: publisher site journal article supplement (https://www.dovepress.com/article/362906)
Supplement: Supplementary file 1 [file get_supplementary_file.php]

**Supplementary Materials**

**Supplementary Table 1** Baseline characteristics of the total study subjects.

|  | **Total**  **(N=425)** |
| --- | --- |
| Age, Years, Mean – SD | 67.7–8.0 |
| Male, N (%) | 413 (97.2) |
| BMI, Kg/m2, Mean – SD | 22.7–3.0 |
| Current smokers, N (%) | 149 (35.1) |
| Smoking, PY, Median (IQR) | 42 (28–55) |
| 6MWD, Meter, Median (IQR) | 423.5 (368.5–480.0) |
| Exertional desaturation, N (%) | 71 (16.7) |
| mMRC score, Mean – SD | 1.64–1.04 |
| mMRC score≥2, N (%) | 193 (45.4) |
| SGRQ score, Median (IQR) | 27.8 (16.9–44.7) |
| BODE index, Mean – SD | 2.60–2.04 |
| Charlson comorbidity index, Mean – SD | 1.27–0.62 |
| Presence of chronic bronchitis, N (%) | 162 (38.1) |
| Presence of chronic bronchitis symptoms assessed by SGRQ, N (%) | 174 (40.9) |
| **Pulmonary functions** |  |
| Post-BD FEV1, % predicted, Mean – SD | 55.3–16.6 |
| Bronchodilator responsiveness, N (%) | 124 (29.2) |
| DLCO, % predicted, Mean – SD | 67.9–22.3 |
| TLC, % predicted, Mean – SD | 107.1–22.9 |
| RV, % predicted, Mean – SD | 120.5–59.8 |
| RV/TLC, %, Mean – SD | 42.3–14.4 |
| **Chest CT measures** |  |
| EI of the whole lung, %, Median (IQR) | 19.4 (11.8–33.2) |
| EI of the upper lung, %, Median (IQR) | 19.7 (10.3–37.0) |
| EI of the lower lung, %, Median (IQR) | 18.0 (11.0–31.4) |
| ATI, Median (IQR) | 0.952 (0.927–0.969) |
| WA%, Median (IQR) | 65.0 (58.5–71.0) |
| Pi10, Median (IQR) | 3.93 (3.45–4.45) |
| Presence of BE/BWT, N (%) | 86 (20.2) |
| Patients who experienced exacerbations in the previous year, N (%) | 83 (19.5) |

**Abbreviations:** SD, standard deviation; BMI, body mass index; PY, pack-years; IQR, interquartile range; 6MWD, 6 min walk distance; mMRC, modified Medical Research Council; SGRQ, Saint George Respiratory Questionnaire; BODE, Body mass index, degree of airflow Obstruction and Dyspnea and Exercise capacity; BD, bronchodilator; FEV1, forced expiratory volume in 1 s; DLCO, diffusing capacity of carbon monoxide; TLC, total lung capacity; RV, residual volume; CT, computed tomography; EI, emphysema index; ATI, air trapping index; WA%, mean wall area percent; Pi10, square root of the wall area for a theoretical airway with an internal perimeter of 10 mm; BE, bronchiectasis; BWT, bronchial wall thickening.

**Supplementary Table 2** Clinical characteristics between non-severe and severe patients

|  | **Non-severe**  **(N=272)** | **Severe**  **(N=153)** | **P value** |
| --- | --- | --- | --- |
| Age, Years, Mean – SD | 66.7–7.8 | 69.5–8.0 | <0.001 |
| Male, N (%) | 265 (97.4) | 148 (96.7) | 0.446 |
| BMI, Kg/m2, Mean – SD | 22.9–2.9 | 22.4–3.2 | 0.104 |
| Smoking, PY, Median (IQR) | 42.5 (27.0–53.8) | 40.0 (27.8–54.0) | 0.356 |
| Current Smoker, N (%) | 78 (32.5) | 42 (28.8) | 0.127 |
| **Pulmonary functions** |  |  |  |
| Post-BD FEV1, % predicted,  Mean – SD | 59.9–16.8 | 53.7–16.9 | <0.001 |
| DLCO, % predicted, Mean – SD | 76.6–23.7 | 67.2–22.0 | <0.001 |
| TLC, % predicted, Mean – SD | 104.1–25.2 | 103.7–20.5 | 0.818 |
| RV, % predicted, Mean – SD | 113.7–63.8 | 118.6–49.3 | 0.284 |
| RV/TLC, %, Mean – SD | 39.8–15.0 | 43.7–12.4 | <0.001 |
| 6MWD, Meter, Median (IQR) | 445.5 (400.3–487.0) | 400 (327.5–478.0) | <0.001 |
| mMRC, Mean – SD | 1.47–0.97 | 1.92–1.10 | <0.001 |
| SGRQ score, Median (IQR) | 25.2 (16.1–40.3) | 33.6 (22.2–48.9) | <0.001 |
| **Chest CT measures** |  |  |  |
| EI of the whole lung, %, Median (IQR) | 16.2 (10.6–28.3) | 22.1 (14.4–34.90) | <0.001 |
| EI of the upper lung, %, Median (IQR) | 17.3 (8.8–33.4) | 22.5 (10.1–38.2) | 0.010 |
| EI of the lower lung, %, Median (IQR) | 16.0 (9.9–26.7) | 21.2 (14.0–31.9) | <0.001 |
| ATI, Median (IQR) | 0.943 (0.917–0.966) | 0.951 (0.923–0.974) | 0.013 |
| WA%, Median (IQR) | 65.9 (58.9–71.8) | 63.2 (57.8–68.9) | 0.028 |
| Pi10, Median (IQR) | 4.02 (3.48–4.54) | 3.77 (3.36–4.29) | 0.009 |
| Patients who experienced exacerbations in the previous year, N (%) | 41 (17.0) | 42 (28.6) | 0.021 |
| Duration of follow-up, Days, Median (IQR) | 1819.5 (949–3561) | 1661 (846–2360) | 0.475 |
| Mortality, N (%) | 33 (12.3) | 25 (16.4) | 0.256 |
| Dropout except death, N (%) | 63 (42.0) | 32 (21.3) | 0.320 |

**Abbreviations:** SD, standard deviation; BMI, body mass index; PY, pack-years; IQR, interquartile range; BD, bronchodilator; FEV1, forced expiratory volume in 1 s; DLCO, diffusing capacity of carbon monoxide; TLC, total lung capacity; RV, residual volume; 6MWD, 6 min walk distance; mMRC, modified Medical Research Council; SGRQ, Saint George Respiratory Questionnaire; CT, computed tomography; EI, emphysema index; UD, upper dominant emphysema group; LD, lower dominant emphysema group; HD, homogeneous group; ATI, air trapping index; WA%, mean wall area percent; Pi10, square root of the wall area for a theoretical airway with an internal perimeter of 10 mm; BE, bronchiectasis; BWT, bronchial wall thickening.

**Participating Institutions of Korean Obstructive Lung Disease Study Group**

Ajou University Hospital, Ajou University School of Medicine, Suwon, Korea

Asan Medical Center, University of Ulsan College of Medicine, Seoul, Korea

CHA Bundang Medical Center, CHA University, Seongnam, Korea

Korea University Anam Hospital, Korea University College of Medicine, Seoul, Korea.

Ewha Womans University Mokdong Hospital, Ewha Womans University College of Medicine, Seoul, Korea

Hanyang University Guri Hospital, Hanyang University College of Medicine, Guri, Korea

Ilsan Paik Hospital, Inje University, Goyang, Korea

Kangnam Sacred Heart Hospital, Hallym University, Seoul, Korea

Kangbuk Samsung Hospital, Sungkyunkwan University School of Medicine, Seoul, Korea

Kangwon National University Hospital, Kangwon National University College of Medicine, Chuncheon, Korea

National Medical Center, Seoul, Korea

Konkuk University Hospital, Konkuk University School of Medicine, Seoul, Korea

Seoul National University Bundang Hospital, Seoul National University College of Medicine, Seongnam, Korea

Seoul National University Hospital, Seoul National University College of Medicine, Seoul, Korea

Seoul St. Mary’s Hospital, Catholic University of Korea, Seoul, Korea

Yeouido St. Mary’s Hospital, Catholic University of Korea, Seoul, Korea
